# Supplementary material
Source: publisher site journal article supplement (https://www.dovepress.com/article/433656)
Supplement: Supplementary file 1 [file get_supplementary_file.php]

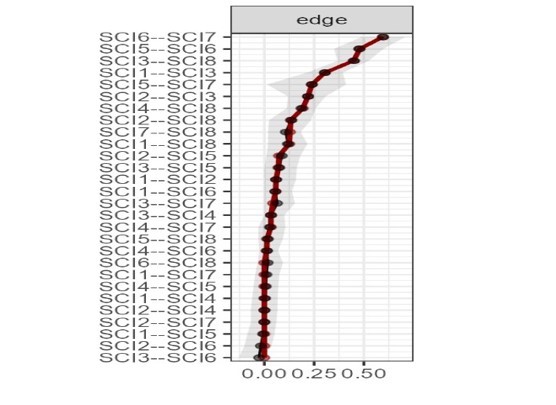


**Supplementary Figure 1** Accuracy of edge weights


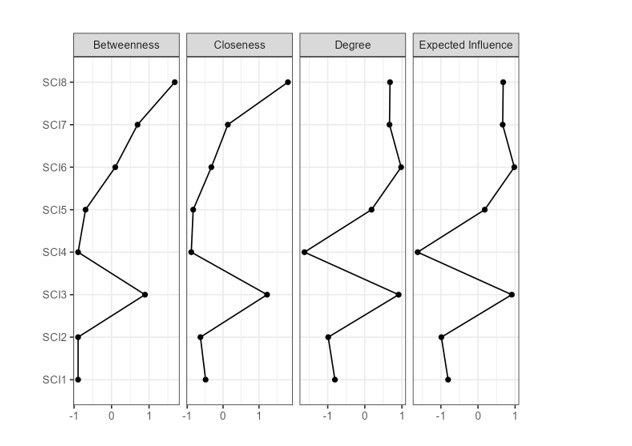


**Supplementary Figure 2** Centrality Plots (Betweenness, Closeness, and Degree/ strength) in the Network for the Association in the Network of Each Node of the Turkish Sleep Condition Indicator Abbreviations: SCI, sleep condition indicator


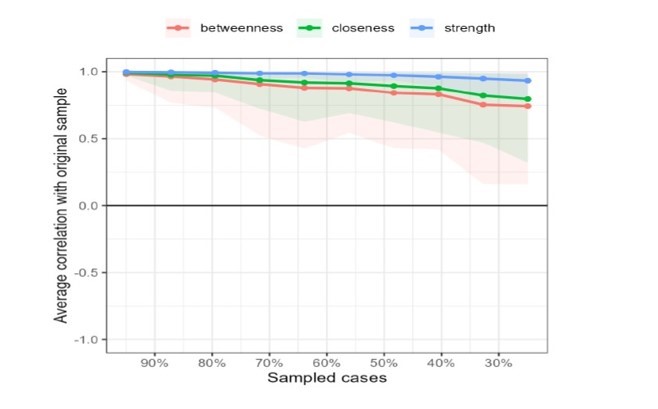


**Supplementary Figure 3** Stability of centrality indices of the Turkish Sleep Condition Indicator

| **Supplementary Table 1** Measurement Invariance of the Turkish Sleep Condition Indicator Across Gender, Having Clinical Insomnia and Poor Sleep Quality. | | | | | | | |
| --- | --- | --- | --- | --- | --- | --- | --- |
| **Model** | **χ2** | **df** | **Δχ2** | **Δdf** | **p** | **CFI** | **ΔCFI** |
| Sex | | | | | | | |
| Configural | 9.665 | 26 |  |  |  | 1.000 |  |
| Metric | 14.640 | 31 | 4.975 | 5 | 0.419 | 1.000 | .000 |
| Scalar | 17.218 | 36 | 2.578 | 5 | 0.765 | 1.000 | .000 |
| Having Insomnia | | | | | | | |
| Configural | 10.577 | 26 |  |  |  | 1.000 |  |
| Metric | 19.402 | 31 | 8.825 | 5 | 0.116 | 1.000 | .000 |
| Scalar | 29.491 | 36 | 10.089 | 5 | 0.073 | 1.000 | .000 |
| Having poor sleep quality | | | | | | | |
| Configural | 8.172 | 26 |  |  |  | 1.000 |  |
| Metric | 11.200 | 31 | 3.028 | 5 | 0.696 | 1.000 | .000 |
| Scalar | 15.580 | 36 | 4.38 | 5 | 0.496 | 1.000 | .000 |
| **Abbreviations:** χ2, chi-square value; df, degrees of freedom; CFI, comparative fit index. | | | | | | | |
